# Supplementary material
Source: publisher figshare collection journal article supplement (https://acs.figshare.com/ndownloader/files/22108470)
Supplement: Supplementary file 1 [file 22108470]

# Supplementary Information - Reactive catalytic fast pyrolysis of biomass over molybdenum oxide catalysts: A parametric study

*Phillip Cross <sup>†\*</sup>, Kaige Wang<sup>‡</sup>, Joseph Weiner, Elliot Reid, Jonathan Peters, Ofel Mante,*

*David C. Dayton*

Technology Advancement and Commercialization, RTI International, Research Triangle

 Park, North Carolina 27709, United States.

**Keywords:** Pyrolysis, Biofuels, Reactive Catalytic Fast Pyrolysis, Hydrodeoxygenation,

Hydropyrolysis

Compounds identified on the GC/MS are grouped into oxygenates and hydrocarbons which are then further classified into seven categories based on functionalities.

Hydrocarbons include mono-aromatics, polyaromatic hydrocarbons (PAH), and aliphatics. Oxygenates are classified as simple phenols, multi-functional phenols, furans,

carbonyls-mono, and carbonyls-multi. Simple phenols will only have a single oxygen atom while multi-functional phenols are classified as having at least one alcohol group in addition to other oxygen functionalities such as methoxy groups, acids or carbonyls. Similarly, carbonyls-mono will have only a single oxygen atom that is double bonded to a carbon atom while the carbonyls-multi will have at least two oxygen atoms. The main compounds identified by GC/MS and their respective categorization is provided in **SI Table 1**.

**SI Table 1.** Primary compounds identified in GC/MS of RCFP bio-crude and their respective categorization.

| Polyaromatic Hydrocarbons |                                           |
|---------------------------|-------------------------------------------|
|                           | Naphthalene, 2,3,6-trimethyl-             |
|                           | Naphthalene, 2,7-dimethyl-                |
|                           | Naphthalene, 1,6,7-trimethyl-             |
|                           | 9H-Fluorene, 2-methyl-                    |
|                           | Fluorene                                  |
|                           | Phenanthrene, 1-methyl-7-(1-methylethyl)- |
|                           | Naphthalene, 2-methyl-                    |
|                           | Naphthalene, 1-methyl-                    |
|                           | Naphthalene                               |
|                           | 1,4,5,8-Tetramethylnaphthalene            |

|               |                                    |
|---------------|------------------------------------|
| Mono-Aromatic |                                    |
|               | p-Xylene                           |
|               | Toluene                            |
|               | Benzene, 1-ethyl-2-methyl-         |
|               | Indene                             |
|               | Indane                             |
|               | Benzene, 1,2,4-trimethyl-          |
|               | Ethylbenzene                       |
|               | 1H-Indene, 2,3-dihydro-4-methyl-   |
|               | 2-Methylindene                     |
|               | 1H-Indene, 1,3-dimethyl-           |
| Simple Phenol |                                    |
|               | Phenol                             |
|               | Phenol, 4-methyl-                  |
|               | Phenol, 2-methyl-                  |
|               | Phenol, 2,3-dimethyl-              |
|               | Phenol, 3-ethyl-                   |
|               | Phenol, 2,4-dimethyl-              |
|               | Phenol, 2-ethyl-                   |
|               | Phenol, 2,4,6-trimethyl-           |
|               | Phenol, 3-methyl-                  |
|               | Phenol, 3-ethyl-5-methyl-          |
| Carbonyl-Mono |                                    |
|               | 2-Cyclopenten-1-one                |
|               | 2-Cyclopenten-1-one, 2-methyl-     |
|               | 2-Butanone                         |
|               | Cyclopentanone                     |
|               | Acetone                            |
|               | 2-Cyclopenten-1-one, 2,3-dimethyl- |
|               | 2-Pentanone                        |
|               | 3-Pentanone                        |
|               | 2-Cyclopenten-1-one, 3-methyl-     |
|               | Cyclopentanone, 2-methyl-          |
| Furan         |                                    |

|                       |                                              |
|-----------------------|----------------------------------------------|
|                       | Furan, 2,5-dimethyl-                         |
|                       | Furan, 3-methyl-                             |
|                       | Benzofuran, 2-methyl-                        |
|                       | 2-Furancarboxaldehyde, 5-methyl-             |
|                       | Ethanone, 1-(2-furanyl)-                     |
|                       | Furan                                        |
|                       | Furan, 2-methyl-                             |
| Multi-function Phenol |                                              |
|                       | Phenol, 2-methoxy-4-(1-propenyl)-, (E)-      |
|                       | Phenol, 2-methoxy-4-methyl-                  |
|                       | Phenol, 2-methoxy-4-(1-propenyl)-            |
|                       | Phenol, 2-methoxy-                           |
|                       | Phenol, 5-methyl-2-(1-methylethyl)-, acetate |
|                       | Eugenol                                      |
|                       | Phenol, 2-methoxy-4-(1-propenyl)-, (Z)-      |
|                       | Resorcinol                                   |
|                       | 2-Methoxy-4-vinylphenol                      |
|                       | Phenol, 4-ethyl-2-methoxy-                   |
